# Supplementary material for: N-terminal acetylation shields proteins from degradation and promotes age-dependent motility and longevity
Source: PubMed Central journal article supplement (PMC10611716; doi:10.1038/s41467-023-42342-y), 2023-10-27
Supplement: 41467_2023_42342_MOESM3_ESM.pdf [file 41467_2023_42342_MOESM3_ESM.pdf]

## **Description of Additional Supplementary Files**

### **File name: Supplementary Data 1**

Description: Genetic interactions scores (qGI) from genome-wide CRISPR knockout screens in HAP1 *NAA30*-KO, *NAA35*-KO, and *NAA38*-KO cells.

### **File name: Supplementary Data 2**

Description: Gene ontology (GO) biological process (BP) enrichment analysis of negative and positive genetic interactions of *NAA35*, *NAA30*, and *NAA38*.

### **File name: Supplementary Data 3**

Description: N-terminal acetylome analysis of HAP1 WT, *NAA30*-KO, *NAA35*-KO, and *NAA38*-KO cells.

### **File name: Supplementary Data 4**

Description: Label-free quantitative (LFQ) shotgun proteomic analysis of HAP1 WT, *NAA30*-KO, *NAA35*-KO, and *NAA38*-KO cells.

### **File name: Supplementary Data 5**

Description: Knockdown of *UBR4* rescues *NAA30*-KO induced changes in protein abundance. Tandem mass tag (TMT) analysis of HAP1 WT and *NAA30*-KO cells treated with siCtrl or si*UBR1/UBR2/UBR4* (triple knockdown).

### **File name: Supplementary Data 6**

Description: List of proteins co-immunoprecipitated with Myc-tagged *Drosophila* Naa30A from embryonic protein extracts.

### **File name: Supplementary Data 7**

Description: List of all primers and peptides used in this study.

### **File name: Supplementary Data 8**

Description: Key Resource Table (Antibodies, cell lines, fly strains, yeast strains, plasmids, siRNA, etc.).

### **File name: Supplementary Movie 1**

Description: *Drosophila* Naa30A deletion males show significantly slower motility (climbing).

### **File name: Supplementary Movie 2**

Description: Moving sperm from control (y1/Y) males.

### **File name: Supplementary Movie 3**

Description: Moving sperm from Naa30A deletion (y1, Naa30 $\Delta$ 74/Y) males.
