# Supplementary material for: N-terminal acetylation shields proteins from degradation and promotes age-dependent motility and longevity
Source: PubMed Central journal article supplement (PMC10611716; doi:10.1038/s41467-023-42342-y), 2023-10-27
Supplement: 41467_2023_42342_MOESM10_ESM.pdf [file 41467_2023_42342_MOESM10_ESM.pdf]

## Supplementary Data 7

### Primers used in this study.

| Primer name                                                                     | Sequence (5'-3')                                                                                                  | Usage                                                                                                                                                                    |
|---------------------------------------------------------------------------------|-------------------------------------------------------------------------------------------------------------------|--------------------------------------------------------------------------------------------------------------------------------------------------------------------------|
| <b>Cell line knockout verification</b>                                          |                                                                                                                   |                                                                                                                                                                          |
| NAA30-KO gDNA F                                                                 | CAACGGATTGATTAGCCCCGAA                                                                                            | HAP1 NAA30-KO, quality control, PCR, sequencing                                                                                                                          |
| NAA30-KO gDNA R                                                                 | GACATATCGTATCGTCCGATCCTC                                                                                          | HAP1 NAA30-KO, quality control, PCR                                                                                                                                      |
| NAA35-KO gDNA F                                                                 | CGACAATGATTCCCATAGACACTTG                                                                                         | HAP1 NAA35-KO, quality control, PCR, sequencing                                                                                                                          |
| NAA35-KO gDNA R                                                                 | ATCTTACCTCTTCAAAAACAGCAGC                                                                                         | HAP1 NAA35-KO, quality control, PCR                                                                                                                                      |
| NAA38-KO gDNA F                                                                 | GCATCCCAGCTACACACAGA                                                                                              | HAP1 NAA38-KO, quality control, PCR, sequencing                                                                                                                          |
| NAA38-KO gDNA R                                                                 | GTACGCTTCAGTGAGCCACA                                                                                              | HAP1 NAA38-KO, quality control, PCR, sequencing                                                                                                                          |
| <b>CRISPR/Cas9-mediated NAA30 gene disruption in human MDA-MB-231 cell line</b> |                                                                                                                   |                                                                                                                                                                          |
| NAA30 sgRNA F                                                                   | <u>CACCg</u> AGCGGCGGCGAGCGATCCCCG                                                                                | Underlined: flanks matching the BsbI restriction site. Bold: inserted nucleotide to increase RNA Pol III initiation. Capital: align with NAA30 or non-targeting sequence |
| NAA30 sgRNA R                                                                   | <u>AAACC</u> GGGATCGCTCGCCGCCGCTc                                                                                 |                                                                                                                                                                          |
| Non-targeting sgRNA F                                                           | <u>CACCg</u> TATTACTGATATTGGTGGG                                                                                  |                                                                                                                                                                          |
| Non-targeting sgRNA R                                                           | <u>AAACCC</u> ACCAATATCAGTAATAc                                                                                   |                                                                                                                                                                          |
| hU6 sequencing F                                                                | CGATACAAGGCTGTTAGAGAG                                                                                             | Human U6 forward sequencing primer.                                                                                                                                      |
| <b>Illumina sequencing</b>                                                      |                                                                                                                   |                                                                                                                                                                          |
| PCR1 F                                                                          | GAGGGCCTATTTCCCATGATTC                                                                                            | CRISPR library prep, PCR1                                                                                                                                                |
| PCR1 R                                                                          | GTTGCGAAAAAGAACGTTTCACGG                                                                                          | CRISPR library prep, PCR1                                                                                                                                                |
| PCR2 pLCV2 U6 amplicon F                                                        | AATGATACGGCGACCACCGAGATCTAC<br>ACnnnnnnnnACACTCTTTCCCTACACGAC<br>GCTCTTCCGATCTTTGTGGAAAGGACGA<br><u>AACACCG</u>   | CRISPR library prep, PCR2<br><br>pLVC2: lentiCRISPR v2<br>nnnnnnnn: denotes i5 or i7 index<br>underlined: denotes annealing sequence                                     |
| PCR2 pLCV2 U6 amplicon R                                                        | CAAGCAGAAGACGGCATAACGAGATnnnn<br>nnnnGTGACTGGAGTTCAGACGTGTGCTC<br>TTCCGATCTACTTGCTATTTCTAGCTCTA<br><u>AAAC</u>    |                                                                                                                                                                          |
| PCR2 pLCV2 tracr amplicon F                                                     | AATGATACGGCGACCACCGAGATCTAC<br>ACnnnnnnnnACACTCTTTCCCTACACGAC<br>GCTCTTCCGATCTACTTGCTATTTCTAGC<br><u>TCTAAAAC</u> |                                                                                                                                                                          |
| PCR2 pLCV2 tracr amplicon R                                                     | CAAGCAGAAGACGGCATAACGAGATnnnn<br>nnnnGTGACTGGAGTTCAGACGTGTGCTC<br>TTCCGATCTTTGTGGAAAGGACGAAAC<br><u>ACCG</u>      |                                                                                                                                                                          |
| <b>Plasmid cloning, mutagenesis, and sequencing</b>                             |                                                                                                                   |                                                                                                                                                                          |
| pCMV6-UBE2M I2G F                                                               | GATCGCCATGggCAAGCTGTTCTC                                                                                          | UBE2M mutagenesis                                                                                                                                                        |
| pCMV6-UBE2M I2A F                                                               | GATCGCCATGgcCAAGCTGTTCTC                                                                                          | UBE2M mutagenesis                                                                                                                                                        |
| pCMV6-UBE2M I2D F                                                               | GATCGCCATGgaCAAGCTGTTCTCGCTG                                                                                      | UBE2M mutagenesis                                                                                                                                                        |
| pCMV6-UBE2M I2E F                                                               | GATCGCCATGgagAAGCTGTTCTC                                                                                          | UBE2M mutagenesis                                                                                                                                                        |
| pCMV6-UBE2M I2L F                                                               | GATCGCCATGcTCAAGCTGTTCTCGCTG                                                                                      | UBE2M mutagenesis                                                                                                                                                        |
| pCMV6-UBE2M I2F F                                                               | GATCGCCATGtTCAAGCTGTTCTCGCTG                                                                                      | UBE2M mutagenesis                                                                                                                                                        |
| pCMV6-UBE2M I2Y F                                                               | GATCGCCATGtaCAAGCTGTTCTC                                                                                          | UBE2M mutagenesis                                                                                                                                                        |
| pCMV6-UBE2M I2P F                                                               | GATCGCCATGccCAAGCTGTTCTCGCTG                                                                                      | UBE2M mutagenesis                                                                                                                                                        |
| pCMV6-UBE2M Mut R                                                               | GCGGCGGCAGATCTCCTC                                                                                                | UBE2M mutagenesis                                                                                                                                                        |

|                                                |                          |                                   |
|------------------------------------------------|--------------------------|-----------------------------------|
| pCMV6-UBE2M del F                              | ACGCGTACGCGGCCGCTC       | UBE2M deletion mutagenesis        |
| pCMV6-UBE2M del R                              | GGCGATCGCGGGCAGATC       | UBE2M deletion mutagenesis        |
| NAA30 E321A F                                  | GGTTGTTTTGGcAACCGAAATAAC | NAA30 E321A mutagenesis           |
| NAA30 E321A R                                  | TCATCACAGTCTCCCTCAAC     | NAA30 E321A mutagenesis           |
| T7 promoter F                                  | TAATACGACTCACTATAGGG     | Plasmid sequencing                |
| CMV promoter F                                 | GAGGTCTATATAAGCAGAGC     | Plasmid sequencing                |
| BGH R                                          | TAGAAGGCACAGTCGAGG       | Plasmid sequencing                |
| M13 R                                          | CAGGAAACAGCTATGAC        | Plasmid sequencing                |
| ADH1 promoter F                                | CCTCGTCATTGTTCTCGTTCC    | Plasmid sequencing (yeast)        |
| <b><u>Drosophila knockout confirmation</u></b> |                          |                                   |
| CG11412/Naa30A F                               | CAAGGAAAGTGGAGGAAGTGC    | Confirming <i>Naa30A</i> deletion |
| CG11412/Naa30A R                               | GGTATGTATCCCTCGCCAATG    | Confirming <i>Naa30A</i> deletion |

### Peptides used in this study.

| Peptide name              | Sequence                     | Derived from       | UniProt KB | Supplier     | Usage             |
|---------------------------|------------------------------|--------------------|------------|--------------|-------------------|
| MIKLFSL (UBE2M)           | MIKLFSL<br>RWGRPVGRRRRPVRVYP | UBE2M              | P61081     | Innovagen AB | Acetylation assay |
| MYTLLSG (ARFRP1)          | MYTLLSG<br>RWGRPVGRRRRPVRVYP | ARFRP1             | Q13795     |              |                   |
| MLPSTSV (UNC50)           | MLPSTSV<br>RWGRPVGRRRRPVRVYP | UNC50              | Q53HI1     |              |                   |
| DDDIAAL ( $\beta$ -actin) | DDDIAAL<br>RWGRPVGRRRRPVRVYP | $\beta$ -actin     | P60709     | Biogenes     |                   |
| Ac-MI-UBE2M-biotin        | Ac-MIKLFSLKQKK-biotin        | UBE2M              | P61081     | Innovagen AB | Peptide pulldown  |
| MI-UBE2M-biotin           | MIKLFSLKQKK-biotin           | UBE2M              | P61081     |              |                   |
| ML-UBE2M-biotin           | MLKLFSLKQKK-biotin           | UBE2M              | P61081     |              |                   |
| MY-UBE2M-biotin           | MYKLFSLKQKK-biotin           | UBE2M              | P61081     |              |                   |
| MF-UBE2M-biotin           | MFKLFSLKQKK-biotin           | UBE2M              | P61081     |              |                   |
| A-UBE2M-biotin            | AIKLFSLKQKK-biotin           | UBE2M              | P61081     |              |                   |
| ME-UBE2M-biotin           | MEKLFSLKQKK-biotin           | UBE2M              | P61081     |              |                   |
| R-UBE2M-biotin            | RIKLFSLKQKK-biotin           | UBE2M              | P61081     |              |                   |
| F-UBE2M-biotin            | FIKLFSLKQKK-biotin           | UBE2M              | P61081     |              |                   |
| R-nsP4-biotin             | RIFSTIEGRTYK-biotin          | Sindbis virus nsP4 | -          |              |                   |
| F-nsP4-biotin             | FIFSTIEGRTYK-biotin          | Sindbis virus nsP4 | -          |              |                   |
| G-nsP4-biotin             | GIFSTIEGRTYK-biotin          | Sindbis virus nsP4 | -          |              |                   |
