# Supplementary material for: N-terminal acetylation shields proteins from degradation and promotes age-dependent motility and longevity
Source: PubMed Central journal article supplement (PMC10611716; doi:10.1038/s41467-023-42342-y), 2023-10-27
Supplement: 41467_2023_42342_MOESM11_ESM.pdf [file 41467_2023_42342_MOESM11_ESM.pdf]

## Key Resource Table

| REAGENT or RESOURCE                          | SOURCE                       | IDENTIFIER                              |
|----------------------------------------------|------------------------------|-----------------------------------------|
| <b>Antibodies</b>                            |                              |                                         |
| ARFRP1                                       | Sigma-Aldrich                | Cat # HPA047028,<br>RRID:AB 2679908     |
| BCL2                                         | Proteintech                  | Cat # 12789-1-AP,<br>RRID:AB 2227948    |
| CAPNS1, Calpain S1                           | Thermo Fisher Scientific     | Cat # PA5-82266,<br>RRID:AB 2789426     |
| c-Myc                                        | Covance                      | Cat # PRB-150C-200,<br>RRID:AB 10063561 |
| c-Myc (9E10)                                 | Santa Cruz Biotechnology     | Cat # sc-40,<br>RRID:AB 627268          |
| COX IV (3E11)                                | Cell Signaling Technology    | Cat # 4850,<br>RRID:AB 2085424          |
| CUL1                                         | Cell Signaling Technology    | Cat # 4995,<br>RRID:AB 2261133          |
| CUL2 (EPR3104(2))                            | Abcam                        | Cat # ab166917                          |
| CUL3                                         | Cell Signaling Technology    | Cat # 2759,<br>RRID:AB 2086432          |
| CUL4A                                        | Cell Signaling Technology    | Cat # 2699,<br>RRID:AB 2086563          |
| CUL4B                                        | Proteintech                  | Cat # 12916-1-AP,<br>RRID:AB 208669     |
| CUL5                                         | Abcam                        | Cat # ab264284                          |
| DIS3                                         | Thermo Fisher Scientific     | Cat # PA5-78427,<br>RRID:AB 2735722     |
| EEA1 (H-300)                                 | Santa Cruz Biotechnology     | Cat # sc-33585,<br>RRID:AB 2277714      |
| FLAG (M2)                                    | Sigma-Aldrich                | Cat # F3165,<br>RRID:AB 259529          |
| GAPDH (0411)                                 | Santa Cruz Biotechnology     | Cat # sc-47724,<br>RRID:AB 627678       |
| GFP (clones 7.1 and 13.1)                    | Roche                        | Cat # 11814460001,<br>RRID:AB 390913    |
| HK1 (R.457.3)                                | Thermo Fisher Scientific     | Cat # MA5-14789,<br>RRID:AB 10987238    |
| IST1                                         | GeneTex                      | Cat # GTX101972,<br>RRID:AB 1241005     |
| KCMF1                                        | Sigma-Aldrich                | Cat # HPA030383,<br>RRID:AB 10599977    |
| LC3B                                         | Thermo Fisher Scientific     | Cat # PA1-46286,<br>RRID:AB 2234770     |
| Mef2                                         | Gift from Dr. Eileen Furlong | N/A                                     |
| Mono- and polyubiquitinated conjugates (FK2) | Enzo Life Sciences           | Cat # BML-PW8810,<br>RRID:AB 10541840   |
| NAA30                                        | Sigma-Aldrich                | Cat # HPA057824,<br>RRID:AB 2683539     |
| p62/SQSTM1 (D-3)                             | Santa Cruz Biotechnology     | Cat # sc-28359,<br>RRID:AB 628279       |
| RBX1 (EPR20185)                              | Abcam                        | Cat # ab221548                          |
| RBX2/RNF7 (EPR12001)                         | Abcam                        | Cat # ab181986                          |
| RGS10 (EPR10657(B))                          | Abcam                        | Cat # ab154172                          |
| RSPRY1                                       | Thermo Fisher Scientific     | Cat # PA5-32048,<br>RRID:AB 2549521     |

|                                                      |                                                                                                     |                                       |
|------------------------------------------------------|-----------------------------------------------------------------------------------------------------|---------------------------------------|
| SLC10A7                                              | Sigma-Aldrich                                                                                       | Cat # SAB2102163,<br>RRID:AB_10607609 |
| UBE2A and UBE2B, known as RAD6                       | Abcam                                                                                               | Cat # ab31917,<br>RRID:AB_777604      |
| UBE2F/NCE1 (EPR12932)                                | Abcam                                                                                               | Cat # ab185234                        |
| UBE2M (EPR5333)                                      | Abcam                                                                                               | Cat # ab109507,<br>RRID:AB_10892148   |
| UBR1                                                 | Bethyl Laboratories                                                                                 | Cat # A302-988A-M,<br>RRID:AB_2780899 |
| UBR2                                                 | Abcam                                                                                               | Cat # ab217069                        |
| UBR4/P600                                            | Abcam                                                                                               | Cat # ab86738,<br>RRID:AB_1952666     |
| UBR5/EDD (D6O8Z)                                     | Cell Signaling Technology                                                                           | Cat # 65344,<br>RRID:AB_2799679       |
| V5                                                   | Thermo Fisher Scientific                                                                            | Cat # R960CUS,<br>RRID:AB_2792973     |
| Vinculin (EPR8185)                                   | Abcam                                                                                               | Cat # ab129002,<br>RRID:AB_11144129   |
| anti-Mouse HRP-linked (sheep)                        | Cytiva                                                                                              | Cat # NA931,<br>RRID:AB_772210        |
| anti-Rabbit HRP-linked (donkey)                      | Cytiva                                                                                              | Cat # NA934,<br>RRID:AB_772206        |
| anti-Mouse Alexa Fluor 488 (goat)                    | Jackson ImmunoResearch                                                                              | Cat # 115-547-003,<br>RRID:AB_2338869 |
| anti-Rabbit Alexa Fluor 594 (goat)                   | Jackson ImmunoResearch                                                                              | Cat # 111-586-003<br>RRID:AB_2338066  |
| anti-Mouse Alexa Fluor 488 (goat)                    | Thermo Fisher Scientific                                                                            | Cat # A-11029,<br>RRID:AB_2534088     |
| anti-Rabbit Alexa Fluor 555 (donkey)                 | Thermo Fisher Scientific                                                                            | Cat # A-31572,<br>RRID:AB_162543      |
| <b>Bacterial and virus strains</b>                   |                                                                                                     |                                       |
| One Shot TOP10 Chemically Competent <i>E. coli</i>   | Invitrogen                                                                                          | Cat # C404006                         |
| One Shot Stbl3 Chemically Competent <i>E. coli</i>   | Invitrogen                                                                                          | Cat # C737303                         |
| Lentivirus for plasmid transduction                  | Generated by standard methods using packaging plasmids pMD2.G and psPAX2 (see Aregger et al., 2020) | N/A                                   |
| <b>Chemicals, peptides, and recombinant proteins</b> |                                                                                                     |                                       |
| Acetyl Coenzyme A, [acetyl-1-14C]                    | PerkinElmer                                                                                         | Cat # NEC313050UC                     |
| Ammonium chloride                                    | Sigma-Aldrich                                                                                       | Cat # 213330                          |
| Aprotinin                                            | Roche                                                                                               | Cat # 10981532001                     |
| Bafilomycin A1                                       | MedChem Express                                                                                     | Cat # HY-100558                       |
| Bortezomib                                           | Calbiochem                                                                                          | Cat # 5.04314                         |
| Bovine Serum Albumin (BSA)                           | Sigma-Aldrich                                                                                       | Cat # A7906                           |
| BbsI-HF                                              | NEB                                                                                                 | Cat # R3539S                          |
| cOmplete EDTA-free protease inhibitor cocktail       | Roche                                                                                               | Cat # 5056489001                      |
| DharmaFECT 1 Transfection Reagent                    | Horizon Discovery                                                                                   | Cat # T-2001-02                       |
| DMEM high glucose                                    | Sigma-Aldrich                                                                                       | Cat # D6546                           |
| DMSO                                                 | Sigma-Aldrich                                                                                       | Cat # D8418                           |
| DPBS, no calcium, no magnesium                       | Gibco                                                                                               | Cat # 14190144                        |
| Dynabeads Protein G                                  | Invitrogen                                                                                          | Cat # 10003D                          |
| EcoRI-HF                                             | New England Biolabs                                                                                 | Cat # R3101S                          |
| Fetal Bovine Serum                                   | Sigma-Aldrich                                                                                       | Cat # F7524                           |

|                                                            |                          |                       |
|------------------------------------------------------------|--------------------------|-----------------------|
| Fetal Bovine Serum (CRISPR screens)                        | Life Technologies        | Cat # 12483-020       |
| Formaldehyde 16% (w/v), Methanol-free                      | Thermo Fisher Scientific | Cat # 28908           |
| ibidi Mounting Medium With DAPI                            | ibidi GmbH               | Cat # 50011           |
| IMDM (Iscove's Modified Dulbecco's Medium)                 | Gibco                    | Cat # 12440061        |
| Laemmli SDS-PAGE sample buffer, 2X                         | Sigma-Aldrich            | Cat # S3401           |
| Laemmli SDS sample buffer, reducing (6X)                   | Alfa Aesar               | Cat # J61337          |
| Leupeptin                                                  | Sigma-Aldrich            | Cat # L2884           |
| L-Glutamine                                                | Sigma-Aldrich            | Cat # G7513           |
| Lipofectamine 2000 transfection reagent                    | Invitrogen               | Cat # 11668019        |
| LysoView 488                                               | Biotium                  | Cat # 70067           |
| Lysyl Endopeptidase, endoLysC                              | Wako                     | Cat # 121-05063       |
| MG132                                                      | Calbiochem               | Cat # 474791          |
| NEBNext Ultra II Q5 Master Mix                             | New England Biolabs      | Cat # M0544L          |
| Nonfat dried milk powder                                   | Applichem                | Cat # A0830           |
| Opti-MEM I Reduced Serum Medium                            | Gibco                    | Cat # 31985070        |
| PBS tablets                                                | Gibco                    | Cat # 18912014        |
| Penicillin-Streptomycin                                    | Sigma-Aldrich            | Cat # P0781           |
| Penicillin-Streptomycin (CRISPR screens)                   | Life Technologies        | Cat # 15140122        |
| Hexadimethrine bromide (polybrene)                         | Sigma-Aldrich            | Cat # H9268           |
| Rhodamine Phalloidin                                       | Thermo Fisher Scientific | Cat # R415            |
| Alexa Fluor 488 Phalloidin                                 | Thermo Fisher Scientific | Cat # A12379          |
| TRITC-conjugated Phalloidin                                | Sigma-Aldrich            | Cat # P1951           |
| Pierce Streptavidin Magnetic Beads                         | Thermo Fisher Scientific | Cat # 88817           |
| ProLong antifade mountant with NucBlue                     | Invitrogen               | Cat # P36983          |
| PureLink RNase A                                           | Invitrogen               | Cat # 12091021        |
| Puromycin                                                  | Sigma-Aldrich            | Cat # P8833           |
| SD-Ura medium                                              | Sunrise Science Products | Cat # 1703-500        |
| siRNA Buffer, 5X                                           | Horizon Discovery        | Cat # B-002000-UB-100 |
| T4 DNA ligase                                              | NEB                      | Cat # M0202S          |
| TBS Buffer, 20X                                            | Thermo Fisher Scientific | Cat # 28358           |
| Tris/Glycine Buffer for Western Blots and Native Gels, 10x | Bio-Rad                  | Cat # 1610771         |
| Tris/Glycine/SDS, 10x                                      | Bio-Rad                  | Cat # 1610772         |
| Triton X-100                                               | Sigma-Aldrich            | Cat # T8787           |
| TrypLE Express Enzyme                                      | Gibco                    | Cat # 12605010        |
| Trypsin, sequencing grade                                  | Promega                  | Cat # V5111           |
| Trypsin-EDTA (0.25%) (CRISPR screens)                      | Gibco                    | Cat # 25200056        |
| Trypsin-EDTA, 10X                                          | Gibco                    | Cat # 15400-054       |
| Ultima Gold F scintillation mixture                        | PerkinElmer              | Cat # 6013179         |
| UltraPure DNase/RNase-Free Distilled Water                 | Invitrogen               | Cat # 10977023        |
| Vectashield antifade mounting medium                       | Vector Labs              | Cat # H-1000          |
| WST-1 reagent                                              | Roche                    | Cat # 5015944001      |
| XmaI                                                       | New England Biolabs      | Cat # R0180S          |
| X-tremeGENE 9 DNA Transfection Reagent                     | Roche                    | Cat # 6365809001      |
| <b>Critical commercial assays</b>                          |                          |                       |
| ATP Bioluminescence Assay Kit                              | Sigma-Aldrich            | Cat # FLAA-1KT        |
| Bio-Rad Bradford Protein Assay Dye Reagent                 | Bio-Rad                  | Cat # 5000006         |

|                                                                                          |                                            |                                       |
|------------------------------------------------------------------------------------------|--------------------------------------------|---------------------------------------|
| GeneJET Gel Extraction Kit                                                               | Thermo Fisher Scientific                   | Cat # K0692                           |
| GeneJET Plasmid Miniprep Kit                                                             | Thermo Fisher Scientific                   | Cat # K0503                           |
| MycoAlert Mycoplasma Detection Kit                                                       | Lonza                                      | Cat # LT07-318                        |
| NucleoBond Xtra Midi Kit                                                                 | Macherey-Nagel                             | Cat # 740410.100                      |
| Pierce BCA protein assay kit                                                             | Thermo Scientific                          | Cat # 23225                           |
| Pierce SuperSignal West Pico PLUS Chemiluminescent Substrate                             | Thermo Fisher Scientific                   | Cat # 34578                           |
| PureLink Quick Gel Extraction Kit                                                        | Invitrogen                                 | Cat # K210025                         |
| Q5 Site-Directed Mutagenesis Kit                                                         | New England Biolabs                        | Cat # E0552S                          |
| Qubit dsDNA BR Assay Kit                                                                 | Invitrogen                                 | Cat # Q32853                          |
| TAGZyme Qcyclease/pGAPase Enzymes                                                        | Qiagen                                     | Cat # 34342                           |
| TMTpro 16plex Label Reagent Set                                                          | Thermo Fisher Scientific                   | Cat # A44521                          |
| Trans-Blot Turbo RTA Mini 0.2 $\mu$ m Nitrocellulose Transfer Kit                        | Bio-Rad                                    | Cat # 1704270                         |
| Wizard Genomic DNA Purification Kit                                                      | Promega                                    | Cat # A1120                           |
| <b>Deposited data</b>                                                                    |                                            |                                       |
| CRISPR screen sequencing data                                                            | This paper                                 | GEO database: GSE221447               |
| N-terminal acetylation proteomics of HAP1 WT and NatC KO cells                           | This paper                                 | ProteomeXchange: PXD034992            |
| LFQ shotgun proteomics of HAP1 WT and NatC KO cells                                      | This paper                                 | ProteomeXchange: PXD034104            |
| TMT proteomics of HAP1 WT and <i>NAA30</i> -KO treated with siCtrl or siUBR4             | This paper                                 | ProteomeXchange: PXD034410            |
| Additional raw data including uncropped immunoblot images                                | This paper                                 | Source Data file                      |
| <b>Experimental models: Cell lines</b>                                                   |                                            |                                       |
| Human: HAP1 WT                                                                           | Horizon Discovery                          | Cat # C361; RRID:CVCL_Y019            |
| Human: HAP1 <i>NAA30</i> -KO                                                             | Horizon Discovery                          | Cat # HZGHC006637c010; RRID:CVCL_SZ74 |
| Human: HAP1 <i>NAA35</i> -KO                                                             | Horizon Discovery                          | Cat # HZGHC006636c011; RRID:CVCL_SZ75 |
| Human: HAP1 <i>NAA38</i> -KO (referred to as KO2 in original ref)                        | Dr. Scott Dixon (Cao et al., 2019)         | N/A                                   |
| Human: HAP1 CtrlB                                                                        | Dr. Scott Dixon (Cao et al., 2019)         | N/A                                   |
| Human: HeLa                                                                              | ATCC                                       | Cat # CCL-2; RRID:CVCL_0030           |
| Human: MDA-MB-231 (parental cell line)                                                   | ATCC                                       | Cat # HTB-26 RRID:CVCL_0062           |
| Human: MDA-MB-231 (monoclonal parental cell line)                                        | This paper                                 | N/A                                   |
| Human: MDA-MB-231 <i>NAA30</i> -KO                                                       | This paper                                 | N/A                                   |
| Human: MDA-MB-231 WT underwent CRISPR procedure with sg <i>NAA30</i> , but is unmodified | This paper                                 | N/A                                   |
| Human: MDA-MB-231 WT underwent CRISPR procedure with non-targeting control sgRNA         | This paper                                 | N/A                                   |
| <b>Experimental models: <i>Drosophila melanogaster</i> strains</b>                       |                                            |                                       |
| Oregon R                                                                                 | Lab collection                             | N/A                                   |
| y <sup>1</sup>                                                                           | Bloomington <i>Drosophila</i> Stock Center | RRID:BDSC_169                         |
| y <sup>1</sup> , Naa30A <sup>A74</sup> /FM0                                              | This paper                                 | N/A                                   |

|                                                                        |                                     |                                            |
|------------------------------------------------------------------------|-------------------------------------|--------------------------------------------|
| w, y <sup>1</sup> , Naa30A <sup>Δ74</sup> /FM0                         | This paper                          | N/A                                        |
| w, y <sup>1</sup> , Naa30A <sup>Δ74</sup> /FM0/DP (1;Y) y <sup>+</sup> | This paper                          | N/A                                        |
| w, y <sup>1</sup> , Naa30A <sup>Δ74</sup> /FM0;;UAS-UbcE2M/TM3,sb      | This paper                          | N/A                                        |
| w;; Naa30A-genomic-8myc                                                | This paper                          | N/A                                        |
| w; Naa30A-genomic-8myc                                                 | This paper                          | N/A                                        |
| w;; Da-Gal4                                                            | Wodarz et al., 1995                 | N/A                                        |
| y <sup>1</sup> P {EPgy2}Naa30A <sup>EY10202</sup> w <sup>67e23</sup>   | Bloomington Drosophila Stock Center | RRID:BDSC_16976                            |
| w;; Mhc-Gal4                                                           | Bloomington Drosophila Stock Center | RRID:BDSC_55133                            |
| w;; UAS-UcbE2M3xH                                                      | Zurich ORFeome Project (FlyOrf)     | Cat # F003044                              |
| <b>Experimental models: <i>Saccharomyces cerevisiae</i> strains</b>    |                                     |                                            |
| BY4742; mak3::kanMX4                                                   | EUROSCARF                           | Cat # Y15470                               |
| BY4741; ARL3::GFP-HISMX6                                               | Invitrogen                          | Cat # 95700                                |
| BY4741; ARL3::GFP-HISMX6; mak3::kanMX4                                 | Aksnes et al., 2013                 | N/A                                        |
| BY4741; ARL3::GFP-HISMX6; pBEVY-U-empty                                | Osberg et al., 2016                 | N/A                                        |
| BY4741; ARL3::GFP-HISMX6; mak3::kanMX4; pBEVY-U-empty                  | Osberg et al., 2016                 | N/A                                        |
| BY4741; ARL3::GFP-HISMX6; mak3::kanMX4; pBEVY-U-DmNAA30                | This paper                          | N/A                                        |
| <b>Recombinant DNA</b>                                                 |                                     |                                            |
| pMD2.G                                                                 | Addgene                             | Cat # 12259; RRID:Addgene 12259            |
| psPAX2                                                                 | Addgene                             | Cat # 12260; RRID:Addgene 12260            |
| TKOv3 library (71,090 gRNAs)                                           | Hart et al., 2017                   | Cat # 90294; RRID:Addgene 90294            |
| pCMV6-MI-UBE2M-Myc-DDK (native)                                        | OriGene                             | Cat # RC208946                             |
| pCMV6-MG-UBE2M-Myc-DDK                                                 | This paper                          | N/A                                        |
| pCMV6-MA-UBE2M-Myc-DDK                                                 | This paper                          | N/A                                        |
| pCMV6-MD-UBE2M-Myc-DDK                                                 | This paper                          | N/A                                        |
| pCMV6-ME-UBE2M-Myc-DDK                                                 | This paper                          | N/A                                        |
| pCMV6-ML-UBE2M-Myc-DDK                                                 | This paper                          | N/A                                        |
| pCMV6-MF-UBE2M-Myc-DDK                                                 | This paper                          | N/A                                        |
| pCMV6-MY-UBE2M-Myc-DDK                                                 | This paper                          | N/A                                        |
| pCMV6-MP-UBE2M-Myc-DDK                                                 | This paper                          | N/A                                        |
| pCMV6-Empty                                                            | This paper                          |                                            |
| pUC-UBE2M-V5-P2A-GST-GFP                                               | VectorBuilder, custom-made          | See Source Data file for complete sequence |
| pcDNA3.1-NAA30-WT-V5                                                   | Starheim et al., 2009               | N/A                                        |
| pcDNA3.1-NAA30-E321A-V5                                                | This paper                          | N/A                                        |
| pcDNA3.1-LacZ-V5-His                                                   | Invitrogen                          | N/A                                        |
| pcDNA3.1-Empty                                                         | Invitrogen                          | N/A                                        |
| pcDNA6.2-hUBR4-V5-Lumio                                                | Tasaki et al., 2009                 | N/A                                        |
| pCDH-EF1-MCS-T2A-GFP                                                   | SBI                                 | Cat # CD527A-1                             |
| pCDH-EF1-UBR4N-FLAG-T2A-GFP                                            | Hunt et al., 2019                   | N/A                                        |
| pCDH-EF1-UBR4C-FLAG-T2A-GFP                                            | Hunt et al., 2019                   | N/A                                        |
| pBEVY-U-empty                                                          | Miller et al., 1998                 | N/A                                        |
| pBEVY-U-HA-DmNAA30                                                     | This paper                          | N/A                                        |
| pBEVY-U-HA-hNAA30                                                      | Osberg et al., 2016                 | N/A                                        |
| pSpCas9(BB)-2A-GFP                                                     | Addgene                             | Cat #48138; RRID:Addgene 48138             |

|                                                     |                                                                                                                                      |                        |
|-----------------------------------------------------|--------------------------------------------------------------------------------------------------------------------------------------|------------------------|
| pSpCas9(BB)-2A-GFP-NAA30                            | This study                                                                                                                           | N/A                    |
| pSpCas9(BB)-2A-GFP-non-targeting control            | This study                                                                                                                           | N/A                    |
| ON-TARGETplus Human KCMF1 (56888) siRNA – SMARTpool | Horizon Discovery                                                                                                                    | Cat # L-017900-01-0050 |
| ON-TARGETplus Human UBE2A (7319) siRNA – SMARTpool  | Horizon Discovery                                                                                                                    | Cat # L-009424-00-0005 |
| ON-TARGETplus Human UBE2B (7320) siRNA – SMARTpool  | Horizon Discovery                                                                                                                    | Cat # L-009930-00-0005 |
| ON-TARGETplus Human UBR1 (197131) siRNA – SMARTpool | Horizon Discovery                                                                                                                    | Cat # L-010691-00-0005 |
| ON-TARGETplus Human UBR2 (23304) siRNA – SMARTpool  | Horizon Discovery                                                                                                                    | Cat # L-006954-00-0005 |
| ON-TARGETplus Human UBR4 (23352) siRNA – SMARTpool  | Horizon Discovery                                                                                                                    | Cat # L-014021-01-0005 |
| ON-TARGETplus Human UBR5 (51366) siRNA – SMARTpool  | Horizon Discovery                                                                                                                    | Cat # L-007189-00-0005 |
| ON-TARGETplus Non-targeting Pool                    | Horizon Discovery                                                                                                                    | Cat # D-001810-10-05   |
| <b>Software and algorithms</b>                      |                                                                                                                                      |                        |
| Adobe Illustrator 2020                              | Adobe Inc<br><a href="https://www.adobe.com">https://www.adobe.com</a>                                                               | RRID:SCR_010279        |
| Adobe Photoshop CS5                                 | Adobe Inc<br><a href="https://www.adobe.com">https://www.adobe.com</a>                                                               | RRID:SCR_014199        |
| BAGEL                                               | Hart et al., 2017<br><a href="https://github.com/hart-lab/bagel">https://github.com/hart-lab/bagel</a>                               | N/A                    |
| Bowtie v0.12.8,                                     | <a href="https://bowtie-bio.sourceforge.net">https://bowtie-bio.sourceforge.net</a>                                                  | RRID:SCR_005476        |
| CHOPCHOP v3                                         | Labun et al., 2019<br><a href="https://chopchop.cbu.uib.no/">https://chopchop.cbu.uib.no/</a>                                        | RRID:SCR_015723        |
| DSRC Integrative Ortholog Prediction Tool (DIOPT)   | Hu et al., 2011<br><a href="https://www.flyrnai.org/cgi-bin/DRSC_orthologs.pl">https://www.flyrnai.org/cgi-bin/DRSC_orthologs.pl</a> |                        |
| FACSDiva 9.0.1                                      | BD Biosciences<br><a href="https://www.bdbiosciences.com">https://www.bdbiosciences.com</a>                                          | RRID:SCR_001456        |
| FlowJo version 10.8.1                               | BD Biosciences<br><a href="https://www.flowjo.com/">https://www.flowjo.com/</a>                                                      | RRID:SCR_008520        |
| Flybase database                                    | <a href="https://flybase.org/">https://flybase.org/</a>                                                                              | RRID:SCR_006549        |
| GraphPad Prism version 9.3.1                        | GraphPad Software<br><a href="https://www.graphpad.com/">https://www.graphpad.com/</a>                                               | RRID:SCR_002798        |
| HoloMonitor App Suite version 3.5.0.214             | PHI AB<br><a href="https://phiab.com/holomonitor/">https://phiab.com/holomonitor/</a>                                                | RRID:SCR_019231        |
| Image Lab version 6.0.1                             | Bio-Rad<br><a href="https://www.bio-rad.com">https://www.bio-rad.com</a>                                                             | RRID:SCR_014210        |
| ImageJ/Fiji version 2.1.0/1.53c                     | Schindelin et al., 2012<br><a href="https://imagej.net/">https://imagej.net/</a>                                                     | RRID:SCR_002285        |
| IMARIS version 9.7.2                                | Oxford instruments<br><a href="https://imaris.oxinst.com/">https://imaris.oxinst.com/</a>                                            | RRID:SCR_00730         |
| Mascot Distiller version 2.7.1.0                    | Matrix Science Ltd<br><a href="https://www.matrixscience.com">https://www.matrixscience.com</a>                                      | RRID:SCR_000307        |
| MaxQuant versions 2.0.1.0 and 1.6.17.0              | Cox and Mann, 2008<br><a href="https://www.maxquant.org/">https://www.maxquant.org/</a>                                              | RRID:SCR_014485        |
| Microsoft Excel                                     | Microsoft<br><a href="https://www.microsoft.com/">https://www.microsoft.com/</a>                                                     | RRID:SCR_016137        |
| Perseus version 1.6.15.0                            | Tyanova et al., 2016<br><a href="https://maxquant.net/perseus/">https://maxquant.net/perseus/</a>                                    | RRID:SCR_015753        |
| SwissProt datase                                    | <a href="https://www.expasy.org/resources/uniprotkb-swiss-prot">https://www.expasy.org/resources/uniprotkb-swiss-prot</a>            | RRID:SCR_021164        |
| Tecan i-control software version 2.0.10.0           | Tecan<br><a href="https://www.tecan.com/">https://www.tecan.com/</a>                                                                 | RRID:SCR_016771        |

| Other                                                              |                               |                   |
|--------------------------------------------------------------------|-------------------------------|-------------------|
| Amersham Protran Western blotting membrane, nitrocellulose, 0.2 µm | Cytiva                        | Cat #GE10600001   |
| Andor Dragonfly 500 confocal microscopy                            | Oxford instruments            | N/A               |
| Axiovert 200M widefield fluorescence microscope                    | Carl Zeiss AG                 | N/A               |
| ChemiDoc XRS+ imaging system                                       | Bio-Rad                       | RRID:SCR_019690   |
| Coverslips, 12 mm Ø                                                | Paul Marienfeld GmbH          | Cat # 0117520     |
| Gel Doc EZ imaging system                                          | Bio-Rad                       | N/A               |
| HoloMonitor M4 system                                              | Phase Holographic Imaging PHI | RRID:SCR_019231   |
| ibiTreat µ-Slide 4-well                                            | ibidi GmbH                    | Cat # 80426       |
| Illustra NAP-10 Columns                                            | Cytiva                        | Cat # 17-0854-01  |
| Infinite 200Pro plate reader                                       | Tecan                         | N/A               |
| LSRFortessa Cell Analyzer                                          | BD Bioscience                 | RRID:SCR_018655   |
| Lunatic microfluidic device                                        | Unchained Labs                |                   |
| OMIX C18 tips                                                      | Agilent Technologies          | Cat # A57003100   |
| Orbitrap Fusion Lumos mass spectrometer                            | Thermo Scientific             | RRID:SCR_020562   |
| Orbitrap Velos mass spectrometer                                   | Thermo                        | RRID:SCR_020550   |
| P81 phosphocellulose paper                                         | Millipore                     | Cat # 3698-915    |
| ReproSil-Pur Basic-C18-HD, 5 µm                                    | Dr. Maisch HPLC GmbH          | Cat # R15.b9h     |
| SampliQ SPE C18 cartridge                                          | Agilent Technologies          | Cat # 5982-1135   |
| Sony SH800 cell sorter                                             | Sony Biotechnology            | RRID:SCR_018066   |
| S-Trap mini columns                                                | ProtiFi                       | Cat # C02-mini-40 |
| TC20 automated cell counter                                        | Bio-Rad                       | N/A               |
| Trans-Blot Turbo transfer System                                   | Bio-Rad                       | N/A               |
| Tri-Carb 2900TR Liquid Scintillation Analyzer                      | PerkinElmer                   | N/A               |
| µPAC column                                                        | PharmaFluidics                | N/A               |
| Whatman Grade 3MM Chr Cellulose Chromatography Paper               | Cytiva                        | Cat # 3030-672    |
